# Supplementary material for: Regulation of cellular response to energy stress by RNF128 via modulation of AMPK activation
Source: Research Square preprint supplement (doi:10.21203/rs.3.rs-7469946/v1), 2025-09-12
Supplement: Supplementary file 1 [file 5535ec241b2a41430071fc6c.docx]

**Supplementary Information**

**
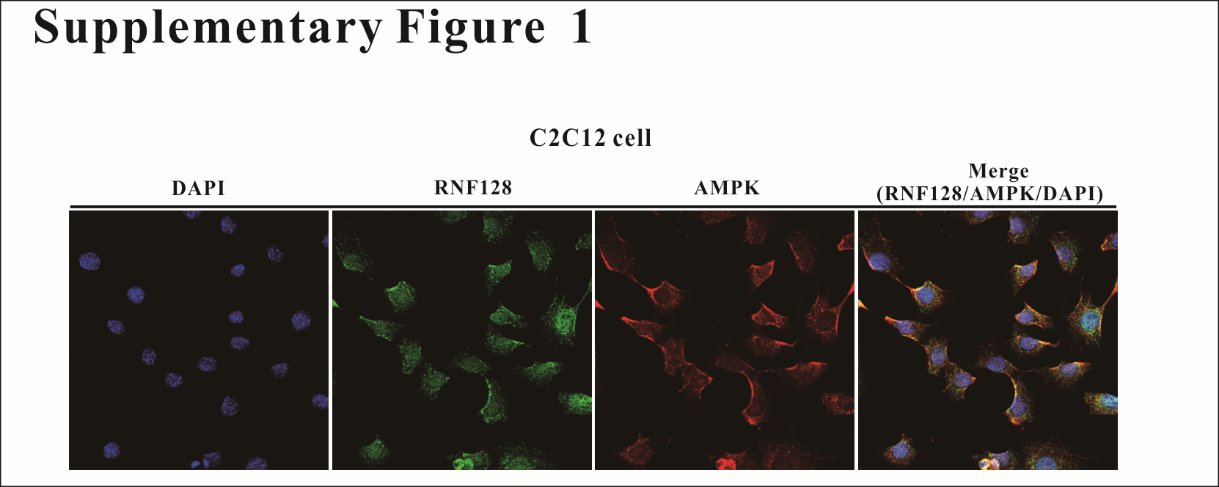
**

**Supplementary Fig. 1 Confocal fluorescence microscopy images of C2C12 cells.**

The subcellular localization of RNF128 and AMPK in C2C12 cells was analyzed using confocal fluorescence microscopy (LSM980).


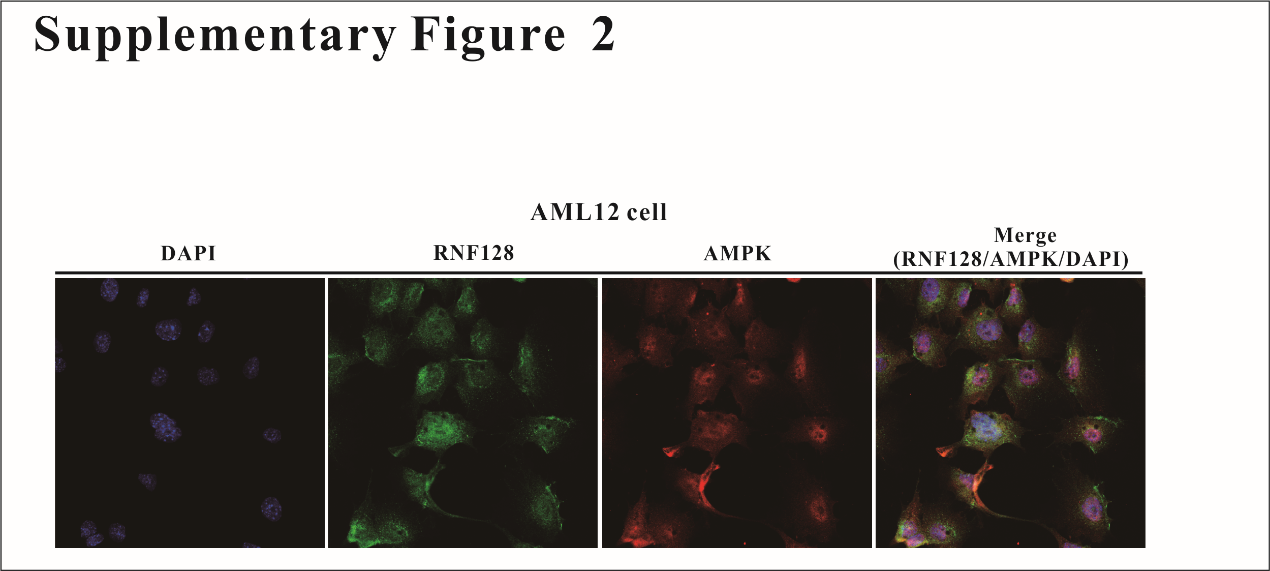


**Supplementary Fig. 2 Confocal fluorescence microscopy images of AML12 cells.**

The subcellular localization of RNF128 and AMPK in AML12 cells was analyzed using confocal fluorescence microscopy (LSM980).


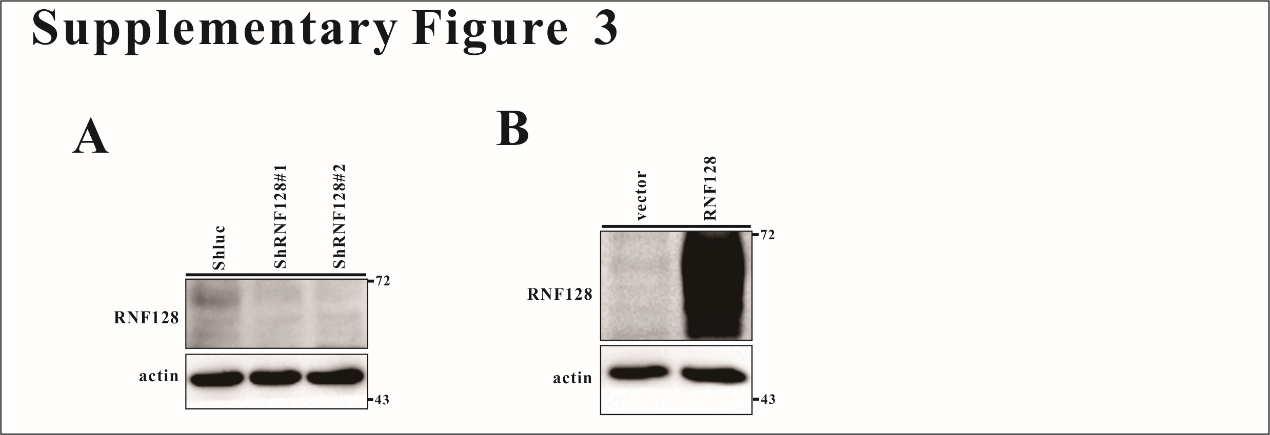


**Supplementary Fig. 3 RNF128 expression in C2C12/shRNF128 and C2C12/RNF128 cells.**

(A, B) Immunoblot analysis assessing RNF128 expression levels in C2C12/shRNF128 and C2C12/RNF128 cells.


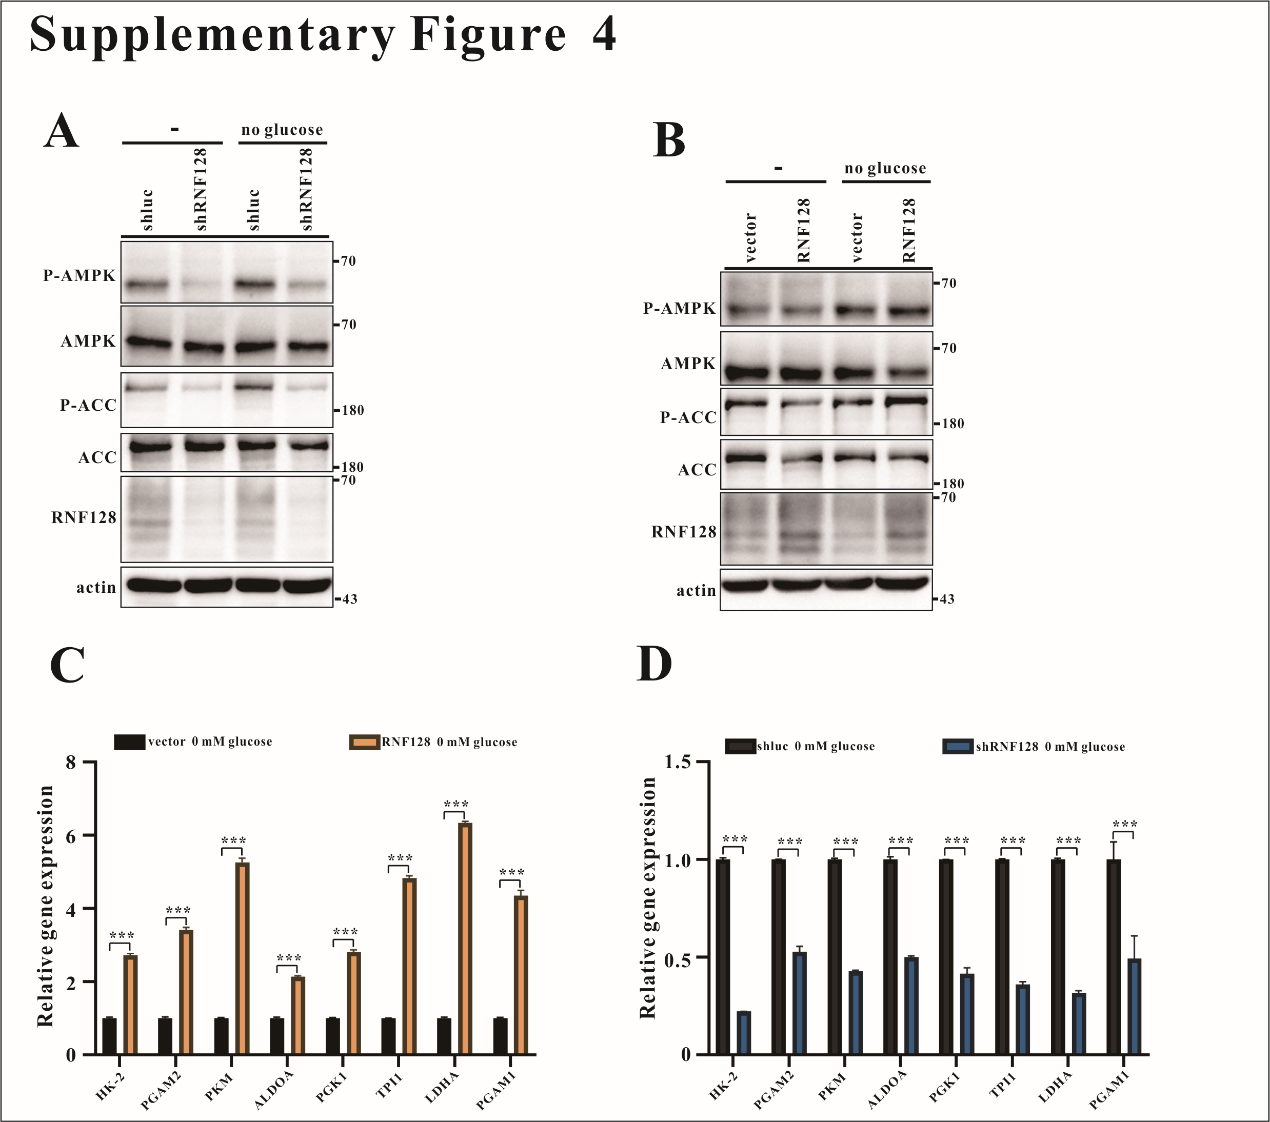


**Supplementary Fig. 4 RNF128 regulates AMPK phosphorylation and glycolysis gene expression in AML12 cells under glucose starvation.**

(A, B) Immunoblot analysis was performed to assess the expression levels of P-AMPK, AMPK, P-ACC, ACC, and RNF128 in specified stable cell lines subjected to glucose deprivation medium. The mRNA levels of Hexokinase-2, Phosphoglycerate mutase 2, Pyruvate kinase m, Aldolase a, Phosphoglycerate kinase 1, Triosephosphate isomerase 1, Lactate dehydrogenase a, and Phosphoglycerate mutase 1 (C) were measured in AML12/vector and AML12/RNF128 cell lines, or (D) in AML12/shluc and AML12/shRNF128 cell lines after exposure to glucose deprivation medium for 6 hours. Data are presented as the mean ± standard deviation. One-way analysis of variance using the Newman–Keuls post hoc test or Student's *t-*test is used to assess the statistical significance. ****P* < 0.001.


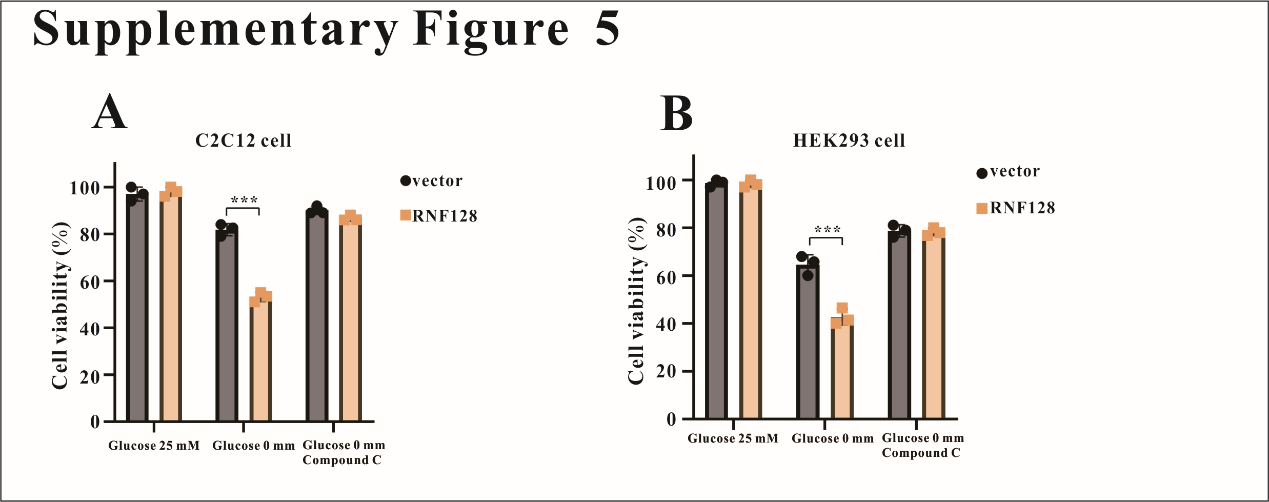


**Supplementary Fig. 5 Inhibition of AMPK restores the effect of RNF128 on cell death during glucose starvation.**

(A, B) C2C12 or HEK293 cells expressing either vector or RNF128 were cultured in glucose-free medium with or without Compound C for 24 hours, and cell viability was assessed. Data are presented as the mean ± standard deviation. One-way analysis of variance using the Newman–Keuls post hoc test or Student's *t-*test is used to assess the statistical significance. ****P* < 0.001.

| **Supplementary Table 1 | Primers used for Q-PCR analysis** | | |
| --- | --- | --- |
| **Primers** | **Forward sequence** | **Reverse sequence** |
| **RNF128** | *5’-GCGTCTGGAGCCGTCATCTTTA-3’* | *5’-GGGCCATGTTTTTTCCCTACTTCTAT-3’* |
| **GAPDH** | *5’-TTCACCACCATGGAGAAGGC-3’* | *5’-GATGGCATGGACTGTGGTC-3’* |
| **mTPI1** | *5’-GCATCGGGGAGAAGCTAGAC-3’* | *5’-GAGCCACCCCATCATTGACA-3’* |
| **mPKM** | *5’-CAGTCCTGGATGGAGCAGAC-3’* | *5’-CTTCAAACAGCAGACGGTG-3’* |
| **mPGAM2** | *5’-ACCGCCTAGTAATGGTTCGC-3’* | *5’-ATCTTTGATAGCGGTGGCCC-3’* |
| **mALDOA** | *5’-GCAGGCCTCTGCTCTAAAGG-3’* | *5’-GAAGAGAGATTCACTGGCTGC-3’* |
| **mLDHA** | *5’-CAAGCTGCTGATCGTCTCC-3’* | *5’-CACTGGAGTCGCCATGTTC-3’* |
| **mPGAM1** | *5’-CATCAGCAAGGATCGCAGGT-3’* | *5’-GATGCTTAACGATGCCCCGA-3’* |
| **mPGK1** | *5’-GATGCTTTCCGAGCCTCACT-3’* | *5’-CCAGCCTTCTGTGGCAGATT-3’* |
| **mHK2** | *5’-CAAAGAGAAGAAGCTCCCGC-3’* | *5’-AATGTCAAAGTCCCCTCTGCG-3’* |

**Supplementary methods**

**Liquid-chromatography (LC)-MS/MS analysis**

The Samples were digested with modified porcine trypsin at 37°C for 16-hours. The peptides were extracted with 0.1% formic acid and loaded on to a reverse-phase column. The desalted peptides were subjected to LC-MS/MS by using an Orbitrap Elite Hybrid Ion Trap-Orbitrap tandem-mass spectrometer interfaced with an 1D-LC (RP), Dionex Ultimate 3000 RSLCnano system (TOOLS Biotech Company). The data analysis was performed using Proteome Discoverer software (version 1.4, Thermo Fisher Scientific). The MS/MS spectra were searched against the Swissprot database using the Mascot search engine (Matrix Science, London, UK; version 2.5) for peptides identification.
